# Supplementary material
Source: MDPI journal article supplement (https://www.mdpi.com/2304-6740/6/3/96)

# checkCIF/PLATON report

You have not supplied any structure factors. As a result the full set of tests cannot be run.

THIS REPORT IS FOR GUIDANCE ONLY. IF USED AS PART OF A REVIEW PROCEDURE FOR PUBLICATION, IT SHOULD NOT REPLACE THE EXPERTISE OF AN EXPERIENCED CRYSTALLOGRAPHIC REFEREE.

No syntax errors found.      CIF dictionary      Interpreting this report

## Datablock: MgHDTMPH2O\_publ

---

Bond precision:    C-C = 0.0163 A

Wavelength=1.54060

Cell:                a=12.5277(3)                b=9.70219(18)                c=8.62226(16)  
                      alpha=91.9174(13)    beta=70.6216(14)    gamma=86.4849(17)  
Temperature: 298 K

|                | Calculated       | Reported          |
|----------------|------------------|-------------------|
| Volume         | 985.16(4)        | 985.16(4)         |
| Space group    | P -1             | P -1              |
| Hall group     | -P 1             | -P 1              |
| Moiety formula | C10 N2 O12 P4, O | ?                 |
| Sum formula    | C10 N2 O13 P4    | C10 Mg1 N2 O13 P4 |
| Mr             | 480.00           | 504.31            |
| Dx,g cm-3      | 1.618            | 0.000             |
| Z              | 2                | 2                 |
| Mu (mm-1)      | 4.116            | 0.000             |
| F000           | 476.0            | 0.0               |
| F000'          | 480.11           |                   |
| h,k,lmax       | 12,9,8           | 12,9,8            |
| Nref           | 2045             | 2044              |
| Tmin,Tmax      |                  | 1.000,1.000       |
| Tmin'          |                  |                   |

Correction method= # Reported T Limits: Tmin=1.000 Tmax=1.000  
AbsCorr = ?

Data completeness= 1.000

Theta(max)= 49.995

R(reflections)=

wR2(reflections)=

S =

Npar=

---

The following ALERTS were generated. Each ALERT has the format  
**test-name\_ALERT\_alert-type\_alert-level.**  
Click on the hyperlinks for more details of the test.

---

### Alert level B

PLAT043\_ALERT\_1\_B Calculated and Reported Mol. Weight Differ by .. 24.31 Check  
PLAT306\_ALERT\_2\_B Isolated Oxygen Atom (H-atoms Missing ?) ..... H2O Check  
PLAT340\_ALERT\_3\_B Low Bond Precision on C-C Bonds ..... 0.01633 Ang.

Mg atom was not taken into account by the program in the sum formula. H-atoms were not localised by powder diffraction

---

### Alert level C

PLAT041\_ALERT\_1\_C Calc. and Reported SumFormula Strings Differ Please Check  
PLAT074\_ALERT\_1\_C Occupancy Parameter = 0.0 for ..... MG1 Check  
PLAT074\_ALERT\_1\_C Occupancy Parameter = 0.0 for ..... MG2 Check  
PLAT155\_ALERT\_4\_C The Triclinic Unitcell is NOT Reduced ..... Please Do !

---

### Alert level G

FORMU01\_ALERT\_2\_G There is a discrepancy between the atom counts in the  
\_chemical\_formula\_sum and the formula from the \_atom\_site\* data.  
Atom count from \_chemical\_formula\_sum: C10 Mg1 N2 O13 P4  
Atom count from the \_atom\_site data: C10 N2 O13 P4  
CELLZ01\_ALERT\_1\_G Difference between formula and atom\_site contents detected.  
CELLZ01\_ALERT\_1\_G ALERT: Large difference may be due to a  
symmetry error - see SYMMG tests  
From the CIF: \_cell\_formula\_units\_Z 2  
From the CIF: \_chemical\_formula\_sum C10 Mg1 N2 O13 P4  
TEST: Compare cell contents of formula and atom\_site data

| atom | Z*formula | cif sites | diff |
|------|-----------|-----------|------|
| Mg   | 2.00      | 0.00      | 2.00 |
| P    | 8.00      | 8.00      | 0.00 |
| O    | 26.00     | 26.00     | 0.00 |
| C    | 20.00     | 20.00     | 0.00 |
| N    | 4.00      | 4.00      | 0.00 |

PLAT004\_ALERT\_5\_G Polymeric Structure Found with Maximum Dimension 3 Info  
PLAT040\_ALERT\_1\_G No H-atoms in this Carbon Containing Compound .. Please Check  
PLAT092\_ALERT\_4\_G Check: Wavelength Given is not Cu,Ga,Mo,Ag,In Ka 1.54060 Ang.  
PLAT300\_ALERT\_4\_G Atom Site Occupancy of Mg1 Constrained at 0.0 Check  
PLAT300\_ALERT\_4\_G Atom Site Occupancy of Mg2 Constrained at 0.0 Check  
PLAT720\_ALERT\_4\_G Number of Unusual/Non-Standard Labels ..... 1 Note  
PLAT860\_ALERT\_3\_G Number of Least-Squares Restraints ..... 64 Note  
PLAT981\_ALERT\_1\_G No non-zero f" Anomalous Scattering Values Found Please Check  
PLAT986\_ALERT\_1\_G No non-zero f' Anomalous Scattering Values Found Please Check

---

0 **ALERT level A** = Most likely a serious problem - resolve or explain  
3 **ALERT level B** = A potentially serious problem, consider carefully  
4 **ALERT level C** = Check. Ensure it is not caused by an omission or oversight  
12 **ALERT level G** = General information/check it is not something unexpected

9 ALERT type 1 CIF construction/syntax error, inconsistent or missing data  
2 ALERT type 2 Indicator that the structure model may be wrong or deficient  
2 ALERT type 3 Indicator that the structure quality may be low  
5 ALERT type 4 Improvement, methodology, query or suggestion  
1 ALERT type 5 Informative message, check

---

---

It is advisable to attempt to resolve as many as possible of the alerts in all categories. Often the minor alerts point to easily fixed oversights, errors and omissions in your CIF or refinement strategy, so attention to these fine details can be worthwhile. In order to resolve some of the more serious problems it may be necessary to carry out additional measurements or structure refinements. However, the purpose of your study may justify the reported deviations and the more serious of these should normally be commented upon in the discussion or experimental section of a paper or in the "special\_details" fields of the CIF. checkCIF was carefully designed to identify outliers and unusual parameters, but every test has its limitations and alerts that are not important in a particular case may appear. Conversely, the absence of alerts does not guarantee there are no aspects of the results needing attention. It is up to the individual to critically assess their own results and, if necessary, seek expert advice.

### **Publication of your CIF in IUCr journals**

A basic structural check has been run on your CIF. These basic checks will be run on all CIFs submitted for publication in IUCr journals (*Acta Crystallographica*, *Journal of Applied Crystallography*, *Journal of Synchrotron Radiation*); however, if you intend to submit to *Acta Crystallographica Section C* or *E* or *IUCrData*, you should make sure that full publication checks are run on the final version of your CIF prior to submission.

### **Publication of your CIF in other journals**

Please refer to the *Notes for Authors* of the relevant journal for any special instructions relating to CIF submission.

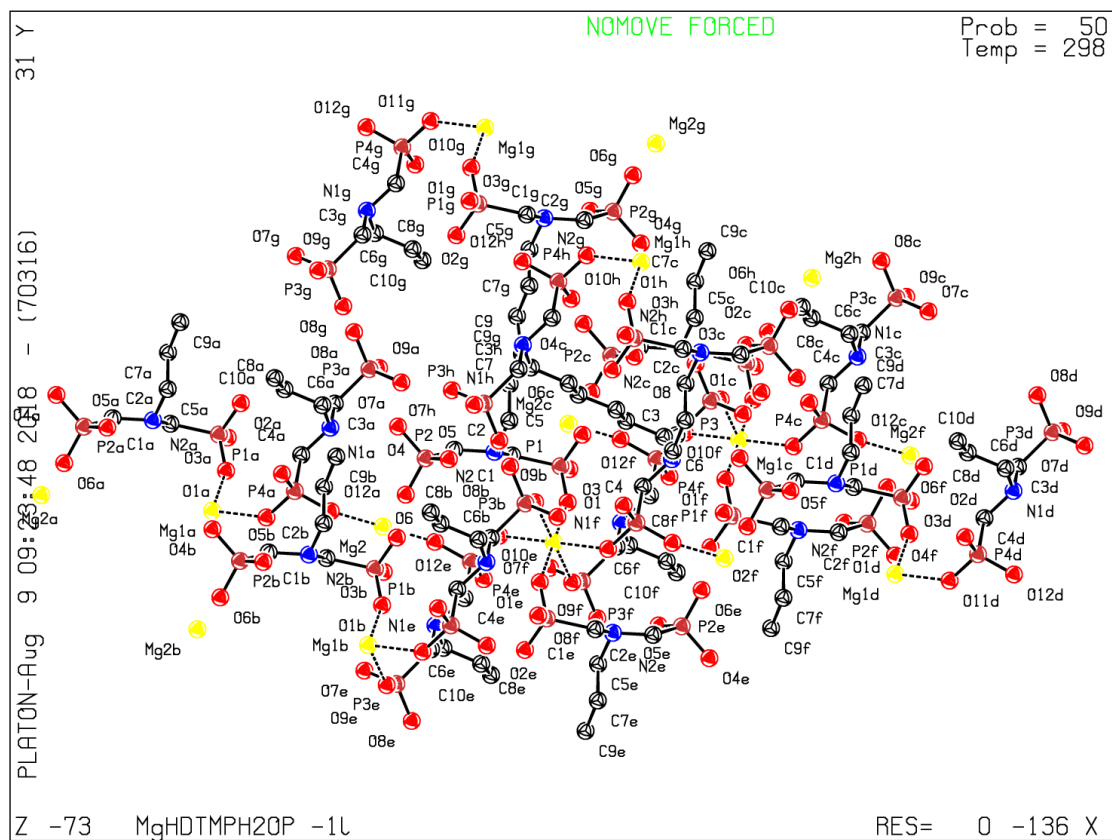

Supplement: s1 [file s1]
