# Supplementary material
Source: MDPI journal article supplement (https://www.mdpi.com/2304-6740/6/3/96)
Supplement: s1 [file s1]

# Supplementary Materials: High-Throughput Synthesis of Pillared-Layered Magnesium Tetraphosphonate Coordination Polymers: Framework Interconversions and Proton Conductivity Studies

Rosario M.P. Colodrero, Inés R. Salcedo, Montse Bazaga-García, Eleni Barouda, Maria Papadaki, Konstantinos E. Papathanasiou, Daniel Hernández-Alonso, Jordi Rius, Miguel A.G. Aranda, Enrique R. Losilla, Pascual Olivera-Pastor, Konstantinos D. Demadis and Aurelio Cabeza

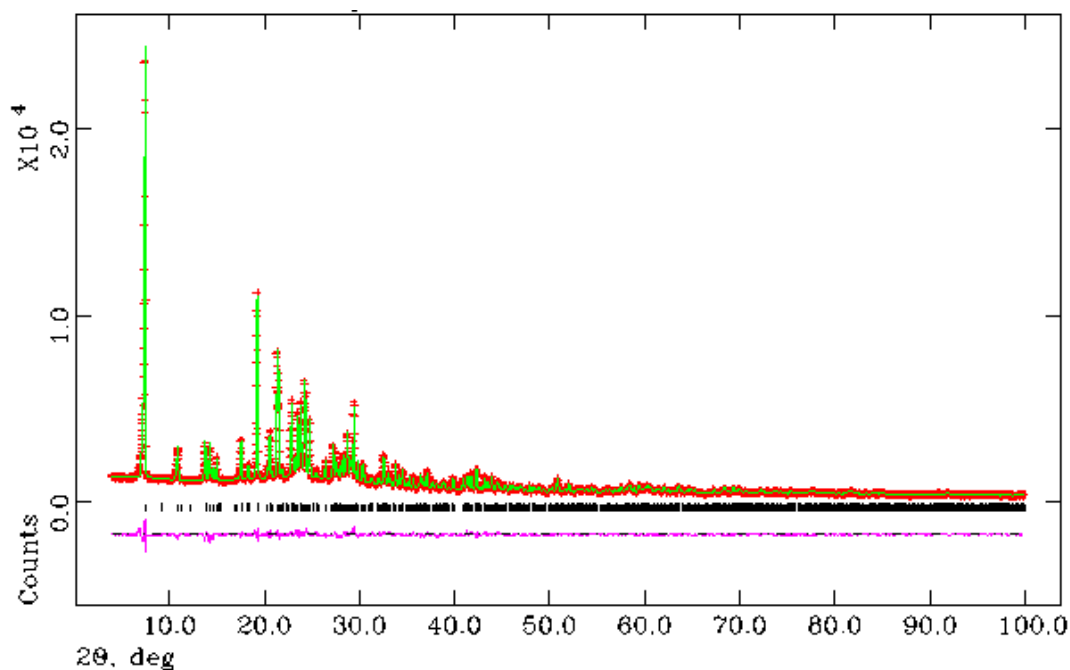

Figure S1. XRPD Rietveld plots for  $\text{Mg}[(\text{HO}_3\text{PCH}_2)_2\text{N}(\text{CH}_2)_6\text{N}(\text{CH}_2\text{PO}_3\text{H}_2)_2] \cdot (\text{H}_2\text{O})$  (1).

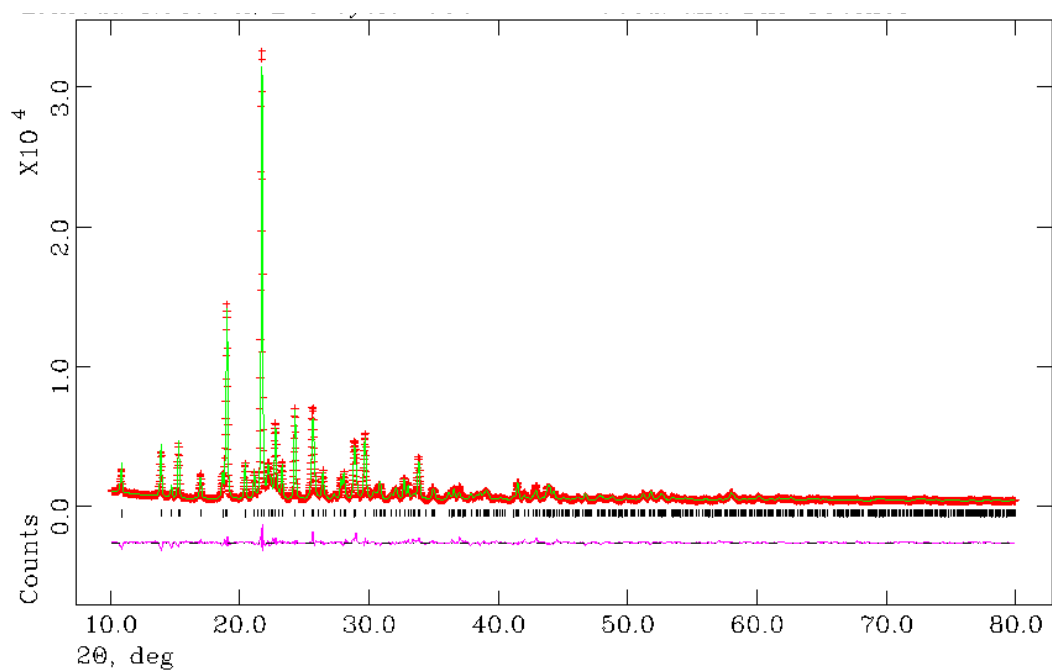

**Figure S2.** XRPD Rietveld plots for  $\text{Mg}[(\text{HO}_3\text{PCH}_2)_2\text{N}(\text{CH}_2)_6\text{N}(\text{CH}_2\text{PO}_3\text{H}_2)_2]$  (1deh).

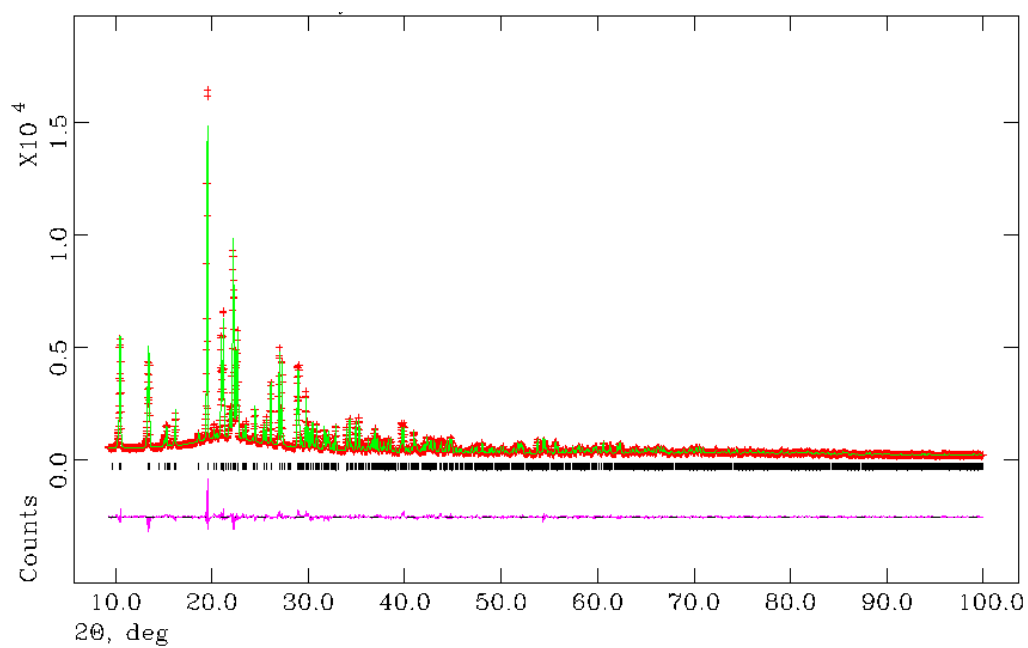

**Figure S3.** XRPD Rietveld plots for  $\text{Mg}[(\text{HO}_3\text{PCH}_2)_2\text{N}(\text{CH}_2)_6\text{N}(\text{CH}_2\text{PO}_3\text{H}_2)_2]$  (2).

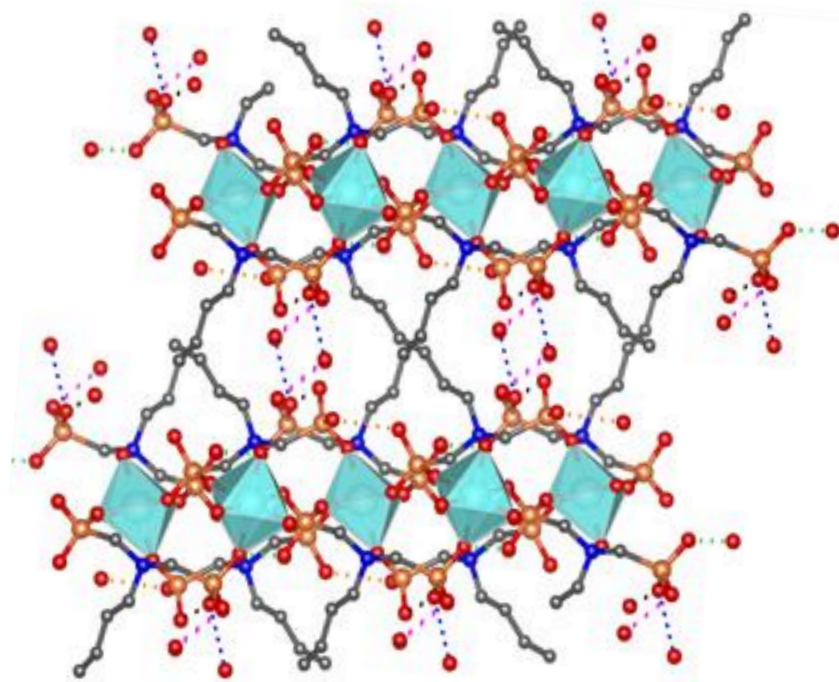

**Figure S4.** *b*-axis view of the H-bond interactions in  $\text{Mg}[(\text{HO}_3\text{PCH}_2)_2\text{N}(\text{CH}_2)_6\text{N}(\text{CH}_2\text{PO}_3\text{H}_2)_2]\cdot(\text{H}_2\text{O})$  (1), O2-O6 2.483(15) green; O4-H<sub>2</sub>O 2.586(18) pink; O5-H<sub>2</sub>O 2.605(16) blue; O7-O10 2.647(14) orange and O5-O8 2.631(13) black dotted lines.

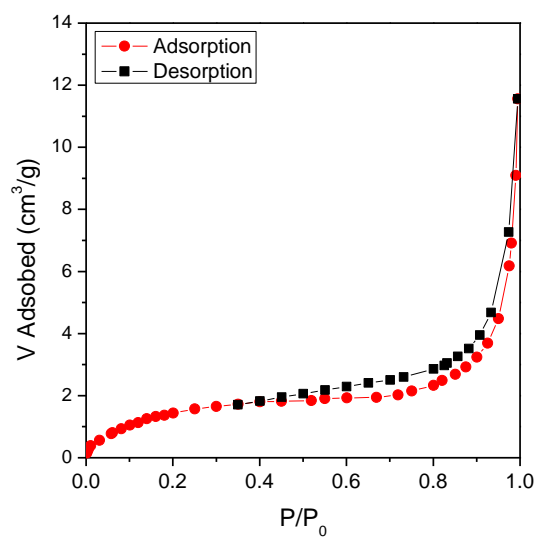

(a)

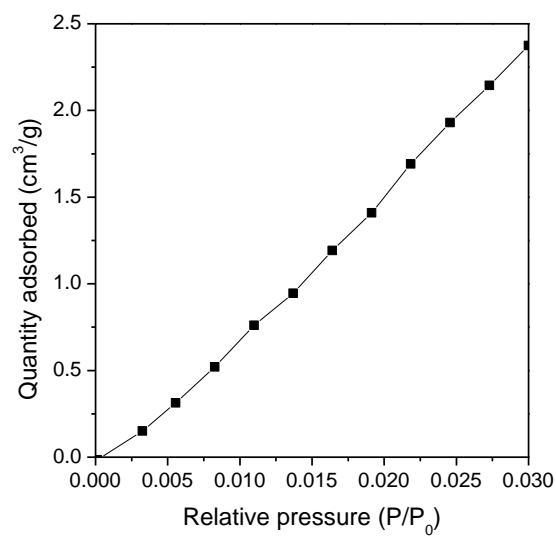

(b)

**Figure S5.** N<sub>2</sub> (a) and CO<sub>2</sub> (b) adsorption/desorption isotherms for  $\text{Mg}[(\text{HO}_3\text{PCH}_2)_2\text{N}(\text{CH}_2)_6\text{N}(\text{CH}_2\text{PO}_3\text{H}_2)_2]\cdot(\text{H}_2\text{O})$  (1).

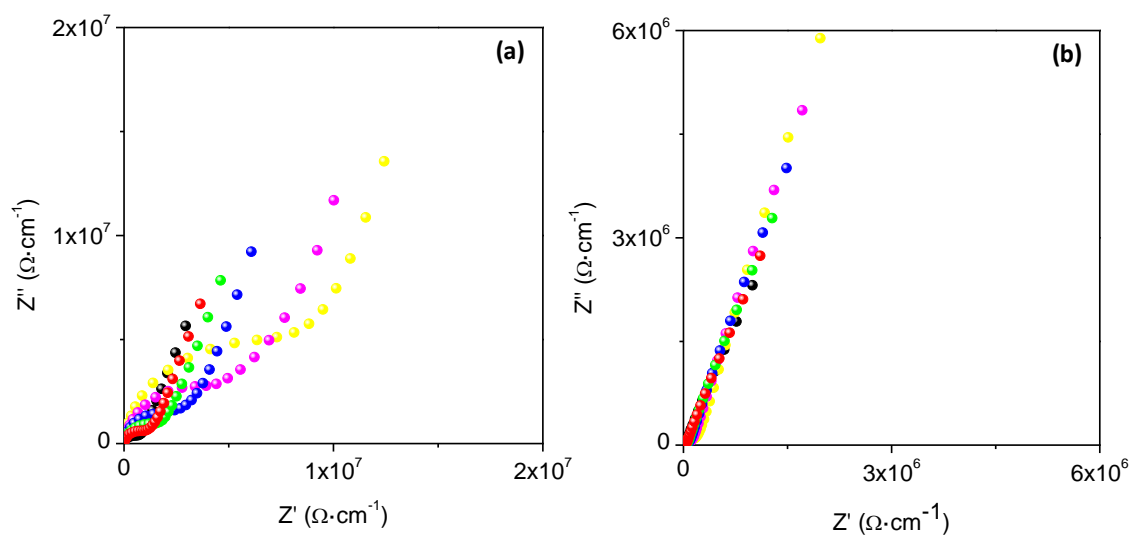

**Figure S6.** Nyquist plots for  $\text{Mg}[(\text{HO}_3\text{PCH}_2)_2\text{N}(\text{CH}_2)_6\text{N}(\text{CH}_2\text{PO}_3\text{H}_2)_2] \cdot (\text{H}_2\text{O})$  (1) at (a) 75% and (b) 95% RH and temperatures: 80 (black), 70 (red), 60 (green), 50 (blue), 40 (magenta) and 30 °C (yellow).

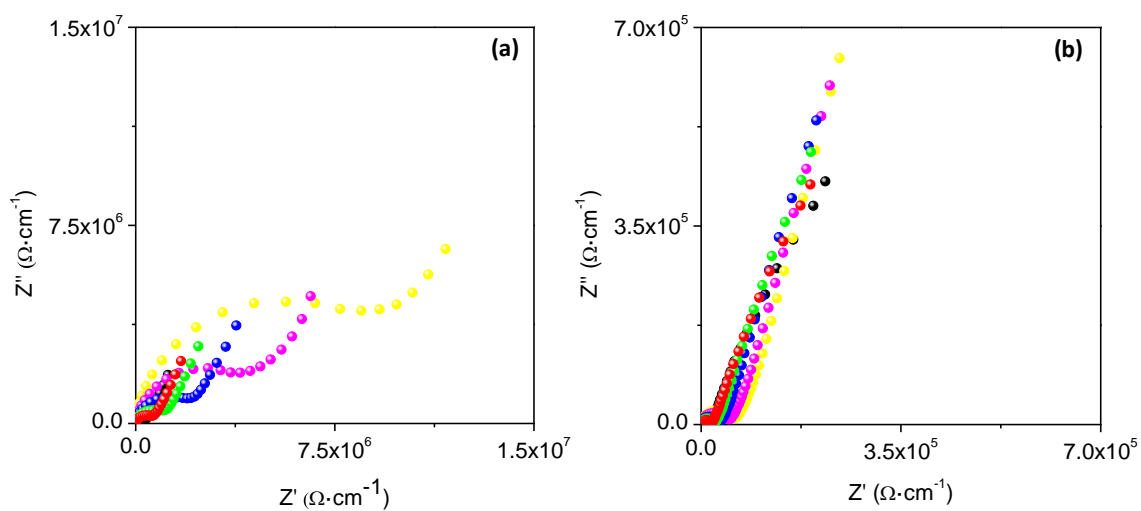

**Figure S7.** Nyquist plots for  $\text{Mg}[(\text{HO}_3\text{PCH}_2)_2\text{N}(\text{CH}_2)_6\text{N}(\text{CH}_2\text{PO}_3\text{H}_2)_2] (\text{H}_2\text{O})$  (1deh) at (a) 75% and (b) 95% RH and temperatures: 80 (black), 70 (red), 60 (green), 50 (blue), 40 (magenta) and 30 °C (yellow).

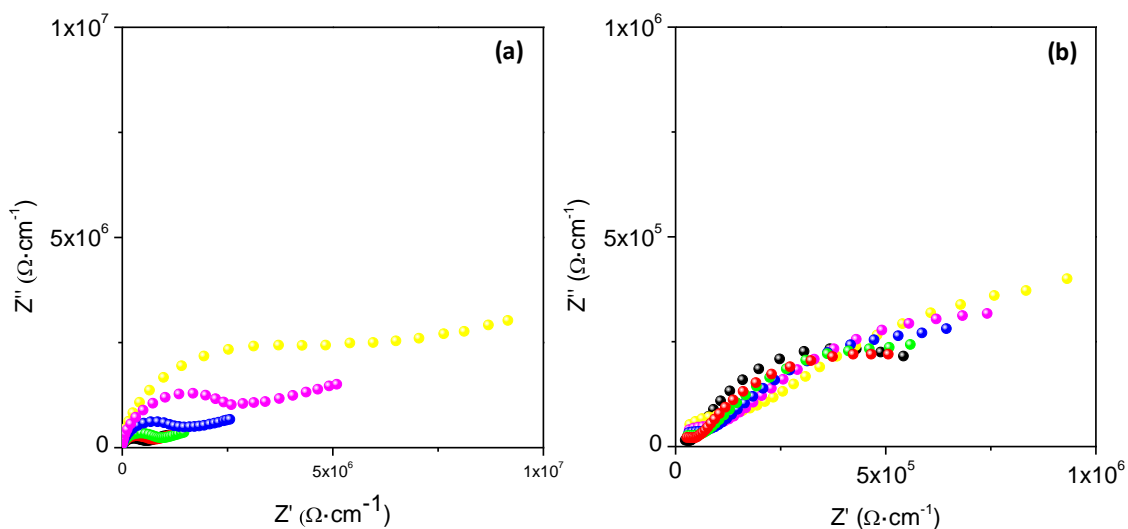

**Figure S8.** Nyquist plots for  $\text{Mg}[(\text{HO}_3\text{PCH}_2)_2\text{N}(\text{CH}_2)_6\text{N}(\text{CH}_2\text{PO}_3\text{H}_2)_2]$  (**2**) at (a) 75% and (b) 95% RH and temperatures: 80 (black), 70 (red), 60 (green), 50 (blue), 40 (magenta) and 30 °C (yellow).

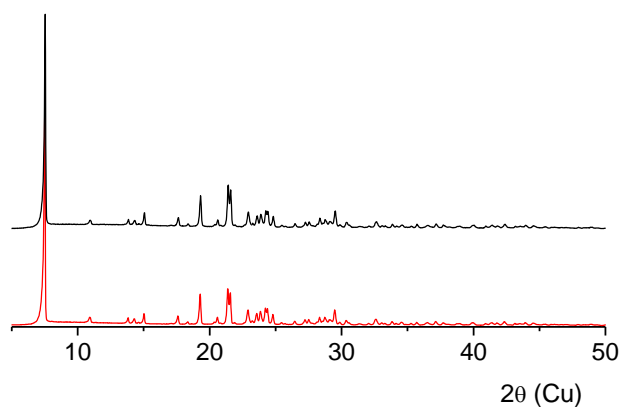

**Figure S9.** X-ray powder diffraction patterns for  $\text{Mg}[(\text{HO}_3\text{PCH}_2)_2\text{N}(\text{CH}_2)_6\text{N}(\text{CH}_2\text{PO}_3\text{H}_2)_2] \cdot (\text{H}_2\text{O})$  (**1**) as synthesized (red) and after impedance measurement (black).

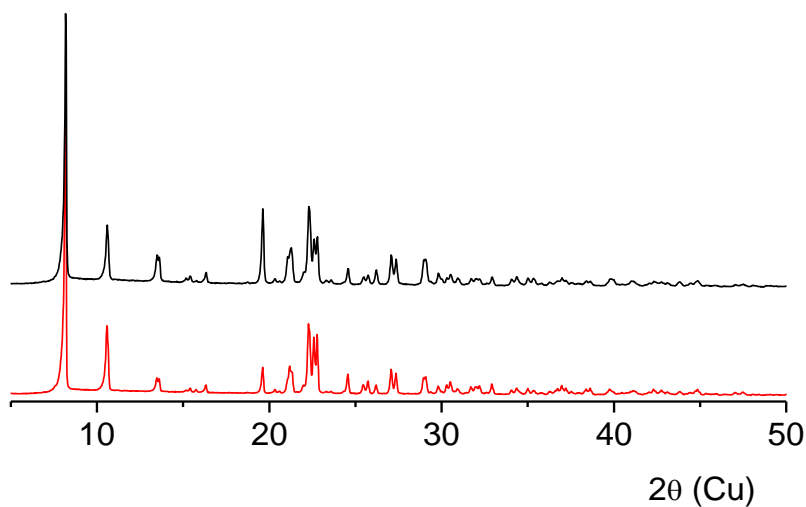

**Figure S10.** X-ray powder diffraction patterns for  $\text{Mg}[(\text{HO}_3\text{PCH}_2)_2\text{N}(\text{CH}_2)_6\text{N}(\text{CH}_2\text{PO}_3\text{H}_2)_2]$  (**2**) as synthesized (red) and after impedance measurement (black).

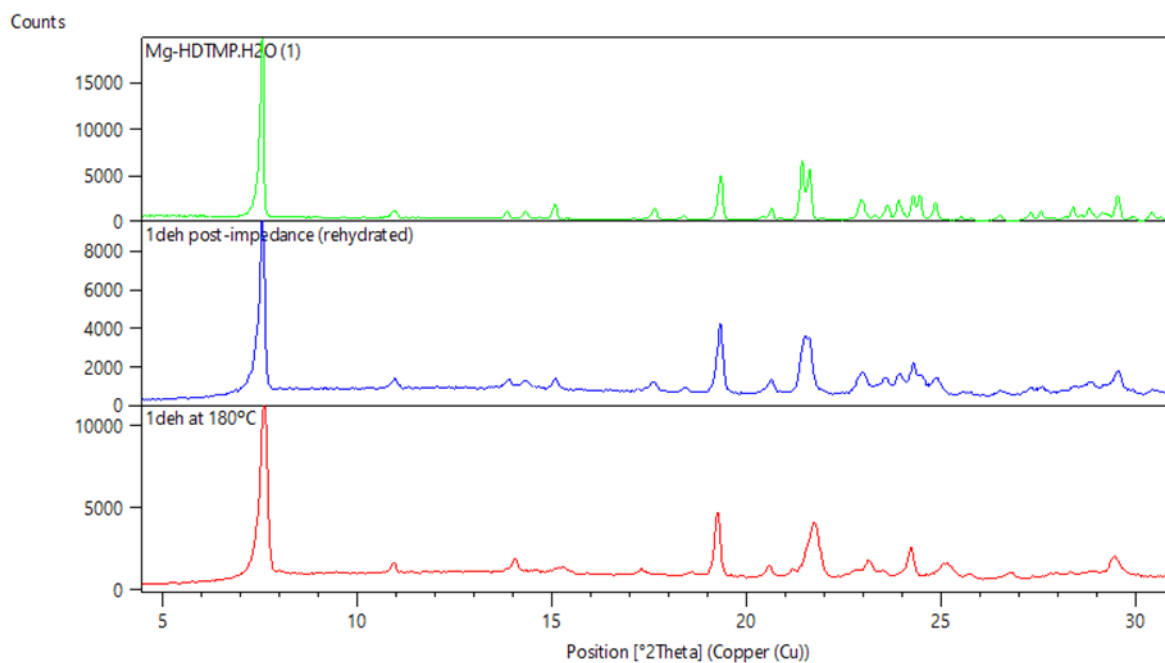

**Figure S11.** X-ray powder diffraction patterns for **Mg[(HO<sub>3</sub>PCH<sub>2</sub>)<sub>2</sub>N(CH<sub>2</sub>)<sub>6</sub>N(CH<sub>2</sub>PO<sub>3</sub>H<sub>2</sub>)<sub>2</sub>] (1deh)** at 180 °C, after impedance measurements and **Mg[(HO<sub>3</sub>PCH<sub>2</sub>)<sub>2</sub>N(CH<sub>2</sub>)<sub>6</sub>N(CH<sub>2</sub>PO<sub>3</sub>H<sub>2</sub>)<sub>2</sub>]·(H<sub>2</sub>O) (1)** for comparative purposes.

Table S1. Hydrogen bond distances for  $\text{Mg}[(\text{HO}_3\text{PCH}_2)_2\text{N}(\text{CH}_2)_6\text{N}(\text{CH}_2\text{PO}_3\text{H}_2)_2]\cdot(\text{H}_2\text{O})$  (1).

| D····A                 | D····A (Å) | D····A                 | D····A (Å) |
|------------------------|------------|------------------------|------------|
| O1····O2               | 2.534(8)   | O5····N2               | 3.067(13)  |
| O1····O3               | 2.507(8)   | O5····H <sub>2</sub> O | 2.606(17)  |
| O1····O9               | 2.946(12)  | O6····O12              | 2.940(13)  |
| O1····O11              | 2.823(12)  | O7····O8               | 2.555(8)   |
| O2····O3               | 2.526(8)   | O7····O9               | 2.543(8)   |
| O2····O6               | 2.483(12)  | O7····O10              | 2.647(12)  |
| O3····O6               | 2.944(12)  | O7····H <sub>2</sub> O | 2.841(15)  |
| O3····O12              | 2.883(13)  | O8····O9               | 2.532(8)   |
| O3····N1               | 2.820(12)  | O9····O11              | 2.831(11)  |
| O4····O5               | 2.536(8)   | O10····O11             | 2.553(8)   |
| O4····O6               | 2.521(8)   | O10····O12             | 2.503(8)   |
| O4····H <sub>2</sub> O | 2.585(14)  | O11····O12             | 2.499(8)   |
| O5····O8               | 2.631(12)  | O11····N2              | 3.080(11)  |

Table S2. Hydrogen bond distances for  $\text{Mg}[(\text{HO}_3\text{PCH}_2)_2\text{N}(\text{CH}_2)_6\text{N}(\text{CH}_2\text{PO}_3\text{H}_2)_2]\cdot(1\text{deh})$ .

| D····A   | D····A (Å) | D····A   | D····A (Å) |
|----------|------------|----------|------------|
| O1····O2 | 2.430(10)  | O4····O5 | 2.946(13)  |
| O1····O3 | 2.597(9)   | O4····O5 | 2.433(9)   |
| O1····O4 | 2.983(10)  | O4····O6 | 2.377(9)   |
| O1····O5 | 2.990(11)  | O4····N  | 3.146(14)  |
| O2····O3 | 2.512(10)  | O5····O6 | 2.525(9)   |
| O3····O6 | 2.950(11)  | O5····N  | 2.840(14)  |

Table S3. Hydrogen bond distances for  $\text{Mg}[(\text{HO}_3\text{PCH}_2)_2\text{N}(\text{CH}_2)_6\text{N}(\text{CH}_2\text{PO}_3\text{H}_2)_2]$  (2).

| D····A    | D····A (Å) | D····A     | D····A (Å) |
|-----------|------------|------------|------------|
| O1····O2  | 2.560(7)   | O5····O11  | 2.454(10)  |
| O1····O3  | 2.530(7)   | O6····O7   | 2.830(11)  |
| O1····O7  | 2.862(11)  | O6····N2   | 2.791(12)  |
| O1····O12 | 3.044(11)  | O7····O8   | 2.570(7)   |
| O2····O3  | 2.491(7)   | O7····O9   | 2.483(7)   |
| O2····O6  | 2.896(13)  | O7····N2   | 3.059(13)  |
| O2····O7  | 2.962(10)  | O8····O9   | 2.533(8)   |
| O2····N2  | 3.011(12)  | O9····N1   | 3.052(12)  |
| O3····O9  | 2.901(10)  | O9····O10  | 2.938(9)   |
| O3····O10 | 2.909(10)  | O10····N1  | 2.736(12)  |
| O3····O12 | 2.862(12)  | O10····O11 | 2.540(7)   |
| O4····O5  | 2.559(7)   | O10····O12 | 2.531(7)   |
| O4····O6  | 2.556(7)   | O11····O12 | 2.548(7)   |
| O5····O6  | 2.506(7)   |            |            |
